# Supplementary material for: Profiling of Gene Expression Biomarkers as a Classifier of Methotrexate Nonresponse in Patients With Rheumatoid Arthritis
Source: PubMed Central journal article supplement (PMC9328381; doi:10.1002/art.40810), 2019-03-19
Supplement: ART-71-678-s002.pdf [file ART-71-678-s002.pdf]

Supplementary Table1: Functional analysis of gene lists from modules. The Top term from each module analysed is reported.

| Module       | Responder status | Time-point | GO BP ID   | count | Size | Pvalue   | Term                                          |
|--------------|------------------|------------|------------|-------|------|----------|-----------------------------------------------|
| Black        | NR               | PT         | GO:0014042 | 2     | 4    | 6.20E-04 | positive regulation of neuron maturation      |
| Greenyellow  | NR               | PT         | GO:0045664 | 9     | 439  | 5.28E-05 | regulation of neuron differentiation          |
| Grey60       | NR               | PT         | GO:0007596 | 19    | 446  | 4.91E-17 | blood coagulation                             |
| Lightgreen   | NR               | PT         | GO:0034340 | 15    | 62   | 2.76E-25 | response to type I interferon                 |
| Lightyellow  | NR               | PT         | GO:0035020 | 2     | 10   | 3.23E-04 | regulation of Rac protein signal transduction |
| Magenta      | NR               | PT         | GO:0051453 | 4     | 38   | 2.89E-05 | regulation of intracellular pH                |
| Midnightblue | NR               | PT         | GO:0019226 | 4     | 54   | 4.01E-05 | transmission of nerve impulse                 |
| Salmon       | NR               | PT         | GO:0001545 | 1     | 1    | 2.83E-03 | primary ovarian follicle growth               |
| grey60       | NR               | 4WK        | GO:0007596 | 17    | 446  | 6.13E-14 | blood coagulation                             |
| Lightcyan    | NR               | 4WK        | GO:0060337 | 16    | 58   | 4.94E-28 | type I interferon signaling pathway           |
| Salmon       | NR               | 4WK        | GO:0000730 | 2     | 6    | 1.70E-04 | DNA recombinase assembly                      |
| Yellow       | NR               | 4WK        | GO:0006955 | 47    | 1207 | 4.96E-06 | immune response                               |

NR=non-responders, PT=pre-treatment, 4WK=4-weeks, GO BP ID=gene ontology biologicalprocess identifier, count=number of genes in list, Size=number of genes in universe (arrayed genes), Pvalue=hypergeometric p-value

Supplementary Table2: Annotation of lightgreen module hub genes.

| EntrezID | Symbol   | Names                                                       | GO_term_BP                    |
|----------|----------|-------------------------------------------------------------|-------------------------------|
| 55337    | C19orf66 | chromosome 19 open reading frame 66                         |                               |
| 129607   | CMPK2    | cytidine/uridine monophosphate kinase 2                     |                               |
| 23070    | CMTR1    | cap methyltransferase 1                                     |                               |
| 23586    | DDX58    | DEXD/H-box helicase 58                                      |                               |
| 55601    | DDX60    | DEXD/H-box helicase 60                                      |                               |
| 79132    | DHX58    | DEXH-box helicase 58                                        |                               |
| 5610     | EIF2AK2  | eukaryotic translation initiation factor 2 alpha kinase 2   |                               |
| 94240    | EPST11   | epithelial stromal interaction 1                            |                               |
| 26270    | FBXO6    | F-box protein 6                                             |                               |
| 85441    | HELZ2    | helicase with zinc finger 2                                 |                               |
| 3430     | IFI35    | interferon induced protein 35                               | response to type I interferon |
| 10561    | IFI44    | interferon induced protein 44                               | response to type I interferon |
| 10964    | IFI44L   | interferon induced protein 44 like                          | response to type I interferon |
| 2537     | IFI6     | interferon alpha inducible protein 6                        | response to type I interferon |
| 3433     | IFIT2    | interferon induced protein with tetratricopeptide repeats 2 | response to type I interferon |
| 3437     | IFIT3    | interferon induced protein with tetratricopeptide repeats 3 | response to type I interferon |
| 3665     | IRF7     | interferon regulatory factor 7                              | response to type I interferon |
| 9636     | ISG15    | ISG15 ubiquitin-like modifier                               | response to type I interferon |
| 27074    | LAMP3    | lysosomal associated membrane protein 3                     |                               |
| 4061     | LY6E     | lymphocyte antigen 6 complex, locus E                       |                               |
| 4599     | MX1      | MX dynamin like GTPase 1                                    | response to type I interferon |
| 4938     | OAS1     | 2'-5'-oligoadenylate synthetase 1                           | response to type I interferon |
| 4939     | OAS2     | 2'-5'-oligoadenylate synthetase 2                           | response to type I interferon |
| 8638     | OASL     | 2'-5'-oligoadenylate synthetase like                        | response to type I interferon |
| 84875    | PARP10   | poly(ADP-ribose) polymerase family member 10                |                               |
| 64761    | PARP12   | poly(ADP-ribose) polymerase family member 12                |                               |
| 54625    | PARP14   | poly(ADP-ribose) polymerase family member 14                |                               |
| 83666    | PARP9    | poly(ADP-ribose) polymerase family member 9                 |                               |
| 51131    | PHF11    | PHD finger protein 11                                       |                               |
| 5359     | PLSCR1   | phospholipid scramblase 1                                   |                               |

|       |          |                                                    |                               |
|-------|----------|----------------------------------------------------|-------------------------------|
| 91543 | RSAD2    | radical S-adenosyl methionine domain containing 2  | response to type I interferon |
| 64108 | RTP4     | receptor transporter protein 4                     |                               |
| 710   | SERPING1 | serpin family G member 1                           |                               |
| 26010 | SPATS2L  | spermatogenesis associated serine rich 2 like      |                               |
| 6773  | STAT2    | signal transducer and activator of transcription 2 | response to type I interferon |
| 23424 | TDRD7    | tudor domain containing 7                          |                               |
| 10673 | TNFSF13B | tumor necrosis factor superfamily member 13b       |                               |
| 27348 | TOR1B    | torsin family 1 member B                           |                               |
| 9246  | UBE2L6   | ubiquitin conjugating enzyme E2 L6                 |                               |
| 11274 | USP18    | ubiquitin specific peptidase 18                    | response to type I interferon |

GO\_term\_BP = gene ontology biological process

Supplementary Table3: Annotation of lightcyan module hub genes.

| EntrezID | Symbol   | Name                                                        | GO_term_BP                          |
|----------|----------|-------------------------------------------------------------|-------------------------------------|
| 116071   | BATF2    | basic leucine zipper ATF-like transcription factor 2        |                                     |
| 129607   | CMPK2    | cytidine/uridine monophosphate kinase 2                     |                                     |
| 23586    | DDX58    | DEXD/H-box helicase 58                                      |                                     |
| 55601    | DDX60    | DEXD/H-box helicase 60                                      |                                     |
| 79132    | DHX58    | DEXH-box helicase 58                                        |                                     |
| 5610     | EIF2AK2  | eukaryotic translation initiation factor 2 alpha kinase 2   |                                     |
| 94240    | EPST1    | epithelial stromal interaction 1                            |                                     |
| 26270    | FBXO6    | F-box protein 6                                             |                                     |
| 85441    | HELZ2    | helicase with zinc finger 2                                 |                                     |
| 3430     | IFI35    | interferon induced protein 35                               | type I interferon signaling pathway |
| 10561    | IFI44    | interferon induced protein 44                               |                                     |
| 10964    | IFI44L   | interferon induced protein 44 like                          |                                     |
| 2537     | IFI6     | interferon alpha inducible protein 6                        | type I interferon signaling pathway |
| 3433     | IFIT2    | interferon induced protein with tetratricopeptide repeats 2 | type I interferon signaling pathway |
| 3437     | IFIT3    | interferon induced protein with tetratricopeptide repeats 3 | type I interferon signaling pathway |
| 8519     | IFITM1   | interferon induced transmembrane protein 1                  | type I interferon signaling pathway |
| 3665     | IRF7     | interferon regulatory factor 7                              | type I interferon signaling pathway |
| 10379    | IRF9     | interferon regulatory factor 9                              | type I interferon signaling pathway |
| 9636     | ISG15    | ISG15 ubiquitin-like modifier                               | type I interferon signaling pathway |
| 27074    | LAMP3    | lysosomal associated membrane protein 3                     |                                     |
| 4061     | LY6E     | lymphocyte antigen 6 complex, locus E                       |                                     |
| 4599     | MX1      | MX dynamin like GTPase 1                                    | type I interferon signaling pathway |
| 4938     | OAS1     | 2'-5'-oligoadenylate synthetase 1                           | type I interferon signaling pathway |
| 4939     | OAS2     | 2'-5'-oligoadenylate synthetase 2                           | type I interferon signaling pathway |
| 8638     | OASL     | 2'-5'-oligoadenylate synthetase like                        | type I interferon signaling pathway |
| 64761    | PARP12   | poly(ADP-ribose) polymerase family member 12                |                                     |
| 54625    | PARP14   | poly(ADP-ribose) polymerase family member 14                |                                     |
| 83666    | PARP9    | poly(ADP-ribose) polymerase family member 9                 |                                     |
| 51131    | PHF11    | PHD finger protein 11                                       |                                     |
| 5359     | PLSCR1   | phospholipid scramblase 1                                   |                                     |
| 91543    | RSAD2    | radical S-adenosyl methionine domain containing 2           | type I interferon signaling pathway |
| 64108    | RTP4     | receptor transporter protein 4                              |                                     |
| 710      | SERPING1 | serpin family G member 1                                    |                                     |
| 3431     | SP110    | SP110 nuclear body protein                                  |                                     |
| 26010    | SPATS2L  | spermatogenesis associated serine rich 2 like               |                                     |
| 6772     | STAT1    | signal transducer and activator of transcription 1          | type I interferon signaling pathway |

|       |        |                                                    |                                     |
|-------|--------|----------------------------------------------------|-------------------------------------|
| 6773  | STAT2  | signal transducer and activator of transcription 2 | type I interferon signaling pathway |
| 23424 | TDRD7  | tudor domain containing 7                          |                                     |
| 27348 | TOR1B  | torsin family 1 member B                           |                                     |
| 9246  | UBE2L6 | ubiquitin conjugating enzyme E2 L6                 |                                     |
| 11274 | USP18  | ubiquitin specific peptidase 18                    | type I interferon signaling pathway |

GO\_term\_BP = gene ontology biological process
